# Supplementary material for: Porcine rotavirus C in pigs with gastroenteritis on Thai swine farms, 2011–2016
Source: PeerJ. 2018 May 8;6:e4724. doi: 10.7717/peerj.4724 (PMC5947060; doi:10.7717/peerj.4724)
Supplement: Supplemental Information 2 [file peerj-06-4724-s002.xlsx]

## Sheet: Sheet1
	VR3												VR4												VR5							VR6
G1	64	65	66	67	68	69	70	71	72	73	74	75	83	84	85	86	87	88	89	90	91	92	93	94	118	119	120	121	122	123	124	131	132	133	134	135	136	137
M61101.1|Porcine group C rotavirus strain Cowden	T	I	V	N	A	T	D	P	F	D	V	R	N	A	V	V	G	S	Q	G	P	G	K	T	R	G	S	I	V	L	K	D	F	V	D	S	V	E
RVC/Pig/THA/CU875-1C/14/G1_(KX911676)	·	V	V	·	A	·	D	·	·	D	·	K	N	A	·	·	·	·	·	·	·	·	·	·	R	·	·	I	V	·	·	·	·	I	E	·	V	·
RVC/Pig/THA/CU-BDN-C/15/G1_(KX911677)	·	V	V	·	A	·	N	·	·	D	·	K	N	A	·	·	·	·	·	·	·	·	·	·	R	·	·	I	V	·	·	·	·	I	E	·	V	·
RVC/Pig/THA/CU4-6C/15/G1_(KX911678)	·	V	V	·	V	·	D	·	·	D	·	K	N	A	·	·	·	·	·	·	·	·	·	·	R	·	·	I	I	·	·	·	·	I	D	·	V	·
RVC/Pig/THA/CU5-1C/15/G1_(KX911679)	·	V	V	·	A	·	N	·	·	E	·	K	N	A	·	·	·	·	·	·	·	·	·	·	R	·	·	I	V	·	·	·	·	I	D	·	V	·
RVC/Pig/THA/CU62C/15/G1_(KX911680)	·	V	V	·	T	·	N	·	·	D	·	K	N	A	·	·	·	·	·	·	·	·	·	·	R	·	·	I	V	·	·	·	·	I	D	·	V	·
RVC/Pig/THA/CU68C/15/G1_(KX911681)	·	V	V	·	A	·	D	·	·	D	·	K	N	A	·	·	·	·	·	·	·	·	·	·	R	·	·	I	V	·	·	·	·	I	D	·	V	·
RVC/Pig/THA/CU69C/15/G1_(KX911682)	·	V	V	·	A	·	D	·	·	D	·	K	N	A	·	·	·	·	·	·	·	·	·	·	R	·	·	I	V	·	·	·	·	I	D	·	V	·
RVC/Pig/THA/CU74C/15/G1_(KX911683)	·	V	V	·	A	·	D	·	·	D	·	K	N	A	·	·	·	·	·	·	·	·	·	·	R	·	·	I	V	·	·	·	·	I	D	·	V	·
RVC/Pig/THA/CU79C/15/G1_(KX911684)	·	V	V	·	A	·	D	·	·	D	·	K	N	A	·	·	·	·	·	·	·	·	·	·	R	·	·	I	V	·	·	·	·	I	D	·	V	·
RVC/Pig/THA/CU99C/16/G1_(KX911685)	·	V	V	·	A	·	N	·	·	D	·	K	N	A	·	·	·	·	·	·	·	·	·	·	R	·	·	I	V	·	·	·	·	I	E	·	V	·
RVC/Pig/THA/CU100C/16/G1_(KX911686)	·	V	V	·	A	·	N	·	·	D	·	K	N	A	·	·	·	·	·	·	·	·	·	·	R	·	·	I	V	·	·	·	·	I	E	·	V	·
RVC/Pig/THA/CU111C/16/G1_(KX911689)	·	V	V	·	A	·	D	·	·	D	·	K	N	A	·	·	·	·	·	·	·	·	·	·	R	·	·	I	V	·	·	·	·	I	D	·	V	·
RVC/Pig/THA/CU109C/16/G1_(KX911688)	·	V	V	·	A	·	D	·	·	D	·	K	N	A	·	·	·	·	·	·	·	·	·	·	R	·	·	I	V	·	·	·	·	I	D	·	V	·
RVC/Pig/THA/CU108C/16/G1_(KX911687)	·	V	V	·	A	·	D	·	·	D	·	K	N	A	·	·	·	·	·	·	·	·	·	·	R	·	·	I	V	·	·	·	·	I	D	·	V	·
RVC/Pig/THA/CU150C/16/G1_(KX911690)	·	V	I	·	A	·	N	·	·	E	·	K	N	A	·	·	·	·	·	·	·	·	·	·	K	·	·	I	V	·	·	·	·	I	D	·	V	·
RVC/Pig/THA/CU201C/16/G1_(KX911691)	·	V	V	·	A	·	N	·	·	D	·	K	N	A	·	·	·	·	·	·	·	·	·	·	R	·	·	I	V	·	·	·	·	I	E	·	V	·
RVC/Pig/THA/CU202/16/G1_(KX911692)	·	V	V	·	A	·	N	·	·	D	·	K	N	A	·	·	·	·	·	·	·	·	·	·	R	·	·	I	V	·	·	·	·	I	E	·	V	·
RVC/Pig/THA/CU115C/15/G1_(MF139516)	·	V	V	·	A	·	D	·	·	D	·	K	N	A	·	·	·	·	·	·	·	·	·	·	R	·	·	I	V	·	·	·	·	I	D	·	V	·
RVC/Pig/THA/CU330C/16/G1_(MF139509)	·	V	V	·	T	·	N	·	·	D	·	K	N	A	·	·	·	·	·	·	·	·	·	·	R	·	·	I	I	·	·	·	·	I	S	·	V	·
RVC/Pig/THA/CU-CHN/15/G1_(KX911670)	·	V	V	·	A	·	N	·	·	D	·	K	T	V	·	·	·	·	·	·	·	·	·	·	R	·	·	I	V	·	·	·	·	I	E	·	V	·
RVC/Pig/THA/CUSB-N/15/G1_(KX911669)	·	V	V	·	A	·	N	·	·	E	·	K	N	A	·	·	·	·	·	·	·	·	·	·	R	·	·	I	V	·	·	·	·	I	D	·	L	·
RVC/Pig/THA/CU781-2/14/G1_(KX911668)	·	V	V	·	T	·	N	·	·	D	·	K	N	A	·	·	·	·	·	·	·	·	·	·	R	·	·	I	V	·	·	·	·	I	D	·	V	·
RVC/Pig/THA/CU5-3/15/G1_(KX911671)	·	V	V	·	T	·	N	·	·	D	·	K	N	A	·	·	·	·	·	·	·	·	·	·	R	·	·	I	V	·	·	·	·	I	D	·	V	·
RVC/Pig/THA/CU60/15/G1_(KX911674)	·	V	V	·	T	·	N	·	·	D	·	K	N	A	·	·	·	·	·	·	·	·	·	·	R	·	·	I	V	·	·	·	·	I	D	·	V	·
RVC/Pig/THA/CU200/16/G1_(KX911675)	·	V	V	·	V	·	N	·	·	D	·	K	N	A	·	·	·	·	·	·	·	·	·	·	R	·	·	I	V	·	·	·	·	I	E	·	V	·
RVC/Pig/THA/CU1035/14/G1_(KX911667)	·	V	V	·	A	·	N	·	·	E	·	K	N	A	·	·	·	·	·	·	·	·	·	·	K	·	·	V	V	·	·	·	·	I	D	·	V	·
RVC/Pig/THA/CU14/15/G1_(KX911672)	·	V	V	·	A	·	D	·	·	D	·	K	N	A	·	·	·	·	·	·	·	·	·	·	R	·	·	I	T	·	·	·	·	I	D	·	V	·
RVC/Pig/THA/CU48/15/G1_(KX911673)	·	V	V	·	T	·	N	·	·	D	·	K	N	A	·	·	·	·	·	·	·	·	·	·	R	·	·	I	V	·	·	·	·	I	D	·	V	·
	VR3												VR4												VR5							VR6
G3	64	65	66	67	68	69	70	71	72	73	74	75	83	84	85	86	87	88	89	90	91	92	93	94	118	119	120	121	122	123	124	131	132	133	134	135	136	137
U31748.1 Porcine group C rotavirus strain HF	T	V	V	N	G	T	S	S	F	D	V	D	A	S	G	L	G	S	P	G	Q	G	K	A	K	G	S	V	N	F	I	D	F	V	N	S	I	D
gi|756420030 RVC/Pig-wt/KOR/09-43-8/2009	·	V	I	·	·	·	N	P	·	·	·	N	·	S	A	V	·	·	·	·	·	·	·	·	·	·	·	·	·	·	·	·	·	·	·	·	·	·
RVC/Pig/THA/CU-PY/12/G3 (KX911693)	·	I	I	·	S	·	N	P	·	·	·	N	·	K	V	V	·	·	·	·	·	·	·	·	·	·	·	·	·	·	·	·	·	·	·	·	·	·
	VR3												VR4												VR5							VR6
G6	64	65	66	67	68	69	70	71	72	73	74	75	83	84	85	86	87	88	89	90	91	92	93	94	118	119	120	121	122	123	124	131	132	133	134	135	136	137
EF464656.1|Porcine rotavirus C isolate 43/06-16	G	V	I	N	V	T	N	P	F	N	V	E	N	A	A	I	G	S	P	G	P	G	K	A	K	G	S	V	I	F	K	D	F	I	N	S	V	E
EU624403.1 Porcine rotavirus C isolate 1GA/05/Cork	G	·	·	·	A	·	K	·	·	N	·	E	·	·	·	V	·	·	·	·	·	·	·	D	·	·	·	·	·	·	·	·	·	·	S	·	·	·
RVC/Pig/THA/CU136/16/G6_(KX911701)	T	·	·	·	A	·	N	·	·	N	·	E	·	·	·	I	·	·	·	·	·	·	·	A	·	·	·	·	·	·	·	·	·	·	N	·	·	·
RVC/Pig/THA/CU135/16/G6_(KX911700)	T	·	·	·	A	·	N	·	·	N	·	E	·	·	·	I	·	·	·	·	·	·	·	A	·	·	·	·	·	·	·	·	·	·	N	·	·	·
RVC/Pig/THA/CU125/16/G6_(KX911699)	T	·	·	·	A	·	N	·	·	N	·	E	·	·	·	I	·	·	·	·	·	·	·	A	·	·	·	·	·	·	·	·	·	·	N	·	·	·
RVC/Pig/THA/CU124/16/G6_(KX911697)	T	·	·	·	A	·	N	·	·	N	·	E	·	·	·	I	·	·	·	·	·	·	·	A	·	·	·	·	·	·	·	·	·	·	N	·	·	·
RVC/Pig/THA/CU123/16/G6_(KX911696)	T	·	·	·	A	·	N	·	·	N	·	E	·	·	·	I	·	·	·	·	·	·	·	A	·	·	·	·	·	·	·	·	·	·	N	·	·	·
RVC/Pig/THA/CU122/16/G6_(KX911698)	T	·	·	·	A	·	N	·	·	N	·	E	·	·	·	I	·	·	·	·	·	·	·	A	·	·	·	·	·	·	·	·	·	·	N	·	·	·
RVC/Pig/THA/CU12/15/G6_(KX911702)	G	·	·	·	A	·	N	·	·	N	·	K	·	·	·	I	·	·	·	·	·	·	·	A	·	·	·	·	·	·	·	·	·	·	N	·	·	·
RVC/Pig/THA/CU146C/16/G6_(MF139517)	G	·	·	·	V	·	N	·	·	D	·	E	·	·	·	I	·	·	·	·	·	·	·	D	·	·	·	·	·	·	·	·	·	·	S	·	·	·
RVC/Pig/THA/CU54/15/G6_(KX911695)	G	·	·	·	A	·	N	·	·	N	·	K	·	·	·	I	·	·	·	·	·	·	·	A	·	·	·	·	·	·	·	·	·	·	N	·	·	·
RVC/Pig/THA/CU571/13/G6_(KX911694)	G	·	·	·	A	·	N	·	·	N	·	E	·	·	·	I	·	·	·	·	·	·	·	A	·	·	·	·	·	·	·	·	·	·	N	·	·	·
	VR3												VR4												VR5							VR6
G9	64	65	66	67	68	69	70	71	72	73	74	75	83	84	85	86	87	88	89	90	91	92	93	94	118	119	120	121	122	123	124	131	132	133	134	135	136	137
JX273347.1 RVC/Pig-wt/USA/TN10-50/2010	I	V	I	N	A	T	N	P	F	N	V	E	N	A	V	V	G	S	Q	G	P	G	Q	T	K	G	S	V	T	L	K	D	F	I	S	S	V	E
KX362473.1 RVC/Pig-wt/VNM/14175_22	T	I	·	·	A	·	N	·	·	·	·	D	·	·	·	·	·	·	·	·	·	·	·	·	K	·	·	·	I	·	·	·	·	·	·	·	·	·
RVC/Pig/THA/CU13/15/G9_(KX911707)	T	I	·	·	A	·	N	·	·	·	·	E	·	·	·	·	·	·	·	·	·	·	·	·	K	·	·	·	I	·	·	·	·	·	·	·	·	·
RVC/Pig/THA/CU49/15/G9_(KX911703)	T	I	·	·	T	·	N	·	·	·	·	E	·	·	·	·	·	·	·	·	·	·	·	·	R	·	·	·	M	·	·	·	·	·	·	·	·	·
RVC/Pig/THA/CU40/15/G9_(KX911705)	T	I	·	·	A	·	N	·	·	·	·	E	·	·	·	·	·	·	·	·	·	·	·	·	K	·	·	·	I	·	·	·	·	·	·	·	·	·
RVC/Pig/THA/CU-SUN/15/G9_(KX911708)	T	I	·	·	A	·	D	·	·	·	·	E	·	·	·	·	·	·	·	·	·	·	·	·	R	·	·	·	V	·	·	·	·	·	·	·	·	·
RVC/Pig/THA/CU84/15/G9_(KX911706)	T	I	·	·	A	·	N	·	·	·	·	E	·	·	·	·	·	·	·	·	·	·	·	·	K	·	·	·	I	·	·	·	·	·	·	·	·	·
RVC/Pig/THA/CU264-U12/13/G9_(KX911704)	T	I	·	·	A	·	S	·	·	·	·	E	·	·	·	·	·	·	·	·	·	·	·	·	K	·	·	·	V	·	·	·	·	·	·	·	·	·
RVC/Pig/THA/CU275C/16/G9_(MF139507)	T	I	·	·	A	·	N	·	·	·	·	E	·	·	·	·	·	·	·	·	·	·	·	·	R	·	·	·	V	·	·	·	·	·	·	·	·	·
RVC/Pig/THA/CU276C/16/G9_(MF139508)	T	I	·	·	A	·	N	·	·	·	·	E	·	·	·	·	·	·	·	·	·	·	·	·	R	·	·	·	V	·	·	·	·	·	·	·	·	·
	VR7															VR8
G1	146	147	148	149	150	151	152	153	154	155	156	157	158	159	160	244	245	246	247	248	249	250	251	252	253	254	255	256	257	258	259
M61101.1|Porcine group C rotavirus strain Cowden	I	I	P	D	S	P	T	N	S	E	S	I	E	R	I	M	N	T	A	S	C	K	L	K	N	C	I	K	G	E	A
RVC/Pig/THA/CU875-1C/14/G1_(KX911676)	·	·	·	·	·	A	T	·	·	·	A	·	·	R	I	·	·	·	·	S	·	·	·	·	·	·	I	·	·	·	·
RVC/Pig/THA/CU-BDN-C/15/G1_(KX911677)	·	·	·	·	·	A	T	·	·	·	A	·	·	R	I	·	·	·	·	S	·	·	·	·	·	·	I	·	·	·	·
RVC/Pig/THA/CU4-6C/15/G1_(KX911678)	·	·	·	·	·	A	T	·	·	·	A	·	·	R	I	·	·	·	·	S	·	·	·	·	·	·	V	·	·	·	·
RVC/Pig/THA/CU5-1C/15/G1_(KX911679)	·	·	·	·	·	P	T	·	·	·	A	·	·	R	I	·	·	·	·	S	·	·	·	·	·	·	I	·	·	·	·
RVC/Pig/THA/CU62C/15/G1_(KX911680)	·	·	·	·	·	A	T	·	·	·	A	·	·	R	I	·	·	·	·	S	·	·	·	·	·	·	I	·	·	·	·
RVC/Pig/THA/CU68C/15/G1_(KX911681)	·	·	·	·	·	A	T	·	·	·	A	·	·	Q	I	·	·	·	·	K	·	·	·	·	·	·	I	·	·	·	·
RVC/Pig/THA/CU69C/15/G1_(KX911682)	·	·	·	·	·	A	T	·	·	·	A	·	·	Q	I	·	·	·	·	K	·	·	·	·	·	·	I	·	·	·	·
RVC/Pig/THA/CU74C/15/G1_(KX911683)	·	·	·	·	·	A	T	·	·	·	A	·	·	Q	I	·	·	·	·	K	·	·	·	·	·	·	I	·	·	·	·
RVC/Pig/THA/CU79C/15/G1_(KX911684)	·	·	·	·	·	A	T	·	·	·	A	·	·	Q	V	·	·	·	·	K	·	·	·	·	·	·	I	·	·	·	·
RVC/Pig/THA/CU99C/16/G1_(KX911685)	·	·	·	·	·	A	T	·	·	·	A	·	·	R	I	·	·	·	·	S	·	·	·	·	·	·	I	·	·	·	·
RVC/Pig/THA/CU100C/16/G1_(KX911686)	·	·	·	·	·	A	T	·	·	·	A	·	·	R	I	·	·	·	·	S	·	·	·	·	·	·	I	·	·	·	·
RVC/Pig/THA/CU111C/16/G1_(KX911689)	·	·	·	·	·	A	A	·	·	·	A	·	·	R	I	·	·	·	·	N	·	·	·	·	·	·	V	·	·	·	·
RVC/Pig/THA/CU109C/16/G1_(KX911688)	·	·	·	·	·	A	A	·	·	·	A	·	·	R	I	·	·	·	·	N	·	·	·	·	·	·	V	·	·	·	·
RVC/Pig/THA/CU108C/16/G1_(KX911687)	·	·	·	·	·	A	A	·	·	·	A	·	·	R	I	·	·	·	·	N	·	·	·	·	·	·	V	·	·	·	·
RVC/Pig/THA/CU150C/16/G1_(KX911690)	·	·	·	·	·	V	T	·	·	·	A	·	·	R	I	·	·	·	·	S	·	·	·	·	·	·	I	·	·	·	·
RVC/Pig/THA/CU201C/16/G1_(KX911691)	·	·	·	·	·	A	T	·	·	·	A	·	·	R	I	·	·	·	·	S	·	·	·	·	·	·	I	·	·	·	·
RVC/Pig/THA/CU202/16/G1_(KX911692)	·	·	·	·	·	A	T	·	·	·	A	·	·	R	I	·	·	·	·	S	·	·	·	·	·	·	I	·	·	·	·
RVC/Pig/THA/CU115C/15/G1_(MF139516)	·	·	·	·	·	A	A	·	·	·	A	·	·	R	I	·	·	·	·	N	·	·	·	·	·	·	V	·	·	·	·
RVC/Pig/THA/CU330C/16/G1_(MF139509)	·	·	·	·	·	A	T	·	·	·	A	·	·	R	I	·	·	·	·	S	·	·	·	·	·	·	I	·	·	·	·
RVC/Pig/THA/CU-CHN/15/G1_(KX911670)	·	·	·	·	·	A	T	·	·	·	A	·	·	R	I	·	·	·	·	S	·	·	·	·	·	·	V	·	·	·	·
RVC/Pig/THA/CUSB-N/15/G1_(KX911669)	·	·	·	·	·	A	T	·	·	·	A	·	·	R	I	·	·	·	·	N	·	·	·	·	·	·	I	·	·	·	·
RVC/Pig/THA/CU781-2/14/G1_(KX911668)	·	·	·	·	·	A	T	·	·	·	A	·	·	R	I	·	·	·	·	S	·	·	·	·	·	·	I	·	·	·	·
RVC/Pig/THA/CU5-3/15/G1_(KX911671)	·	·	·	·	·	T	T	·	·	·	A	·	·	R	I	·	·	·	·	S	·	·	·	·	·	·	I	·	·	·	·
RVC/Pig/THA/CU60/15/G1_(KX911674)	·	·	·	·	·	A	T	·	·	·	A	·	·	R	I	·	·	·	·	S	·	·	·	·	·	·	I	·	·	·	·
RVC/Pig/THA/CU200/16/G1_(KX911675)	·	·	·	·	·	A	T	·	·	·	A	·	·	R	I	·	·	·	·	S	·	·	·	·	·	·	I	·	·	·	·
RVC/Pig/THA/CU1035/14/G1_(KX911667)	·	·	·	·	·	V	T	·	·	·	A	·	·	R	I	·	·	·	·	S	·	·	·	·	·	·	I	·	·	·	·
RVC/Pig/THA/CU14/15/G1_(KX911672)	·	·	·	·	·	V	T	·	·	·	A	·	·	Q	I	·	·	·	·	S	·	·	·	·	·	·	I	·	·	·	·
RVC/Pig/THA/CU48/15/G1_(KX911673)	·	·	·	·	·	T	T	·	·	·	A	·	·	R	I	·	·	·	·	S	·	·	·	·	·	·	I	·	·	·	·
	VR7															VR8
G3	146	147	148	149	150	151	152	153	154	155	156	157	158	159	160	244	245	246	247	248	249	250	251	252	253	254	255	256	257	258	259
U31748.1 Porcine group C rotavirus strain HF	L	I	H	D	N	L	A	D	S	E	T	I	E	Q	V	M	N	Q	A	T	C	R	I	K	N	C	M	K	G	E	E
gi|756420030 RVC/Pig-wt/KOR/09-43-8/2009	L	M	H	·	N	·	A	N	·	·	·	I	·	·	V	·	·	·	·	N	·	·	·	·	·	·	V	·	·	·	·
RVC/Pig/THA/CU-PY/12/G3 (KX911693)	I	V	Q	·	D	·	G	N	·	·	·	V	·	·	I	·	·	·	·	T	·	·	·	·	·	·	C	·	·	·	·
	VR7															VR8
G6	146	147	148	149	150	151	152	153	154	155	156	157	158	159	160	244	245	246	247	248	249	250	251	252	253	254	255	256	257	258	259
EF464656.1|Porcine rotavirus C isolate 43/06-16	I	I	P	D	K	P	D	D	S	E	A	I	E	Q	I	M	S	S	S	V	N	Q	L	Q	C	R	L	K	N	C	I
EU624403.1 Porcine rotavirus C isolate 1GA/05/Cork	·	I	·	·	E	·	K	N	·	·	A	·	·	·	·	·	-	-	-	-	·	·	·	Q	·	K	·	·	·	·	I
RVC/Pig/THA/CU136/16/G6_(KX911701)	·	I	·	·	K	·	D	D	·	·	A	·	·	·	·	·	S	S	S	M	·	·	·	Q	·	K	·	·	·	·	V
RVC/Pig/THA/CU135/16/G6_(KX911700)	·	I	·	·	K	·	D	D	·	·	A	·	·	·	·	·	S	S	S	M	·	·	·	Q	·	K	·	·	·	·	V
RVC/Pig/THA/CU125/16/G6_(KX911699)	·	I	·	·	K	·	D	D	·	·	A	·	·	·	·	·	S	S	S	M	·	·	·	Q	·	K	·	·	·	·	V
RVC/Pig/THA/CU124/16/G6_(KX911697)	·	I	·	·	K	·	D	D	·	·	A	·	·	·	·	·	S	S	S	M	·	·	·	Q	·	K	·	·	·	·	V
RVC/Pig/THA/CU123/16/G6_(KX911696)	·	I	·	·	K	·	D	D	·	·	A	·	·	·	·	·	S	S	S	M	·	·	·	Q	·	K	·	·	·	·	V
RVC/Pig/THA/CU122/16/G6_(KX911698)	·	I	·	·	K	·	D	D	·	·	A	·	·	·	·	·	S	S	S	M	·	·	·	Q	·	K	·	·	·	·	V
RVC/Pig/THA/CU12/15/G6_(KX911702)	·	I	·	·	K	·	D	N	·	·	E	·	·	·	·	·	S	S	S	V	·	·	·	Q	·	K	·	·	·	·	V
RVC/Pig/THA/CU146C/16/G6_(MF139517)	·	I	·	·	K	·	D	K	·	·	E	·	·	·	·	·	-	-	-	-	·	·	·	K	·	K	·	·	·	·	V
RVC/Pig/THA/CU54/15/G6_(KX911695)	·	I	·	·	K	·	D	N	·	·	E	·	·	·	·	·	S	S	S	V	·	·	·	Q	·	K	·	·	·	·	V
RVC/Pig/THA/CU571/13/G6_(KX911694)	·	V	·	·	K	·	D	D	·	·	A	·	·	·	·	·	S	S	S	I	·	·	·	Q	·	K	·	·	·	·	I
	VR7															VR8
G9	146	147	148	149	150	151	152	153	154	155	156	157	158	159	160	244	245	246	247	248	249	250	251	252	253	254	255	256	257	258	259
JX273347.1 RVC/Pig-wt/USA/TN10-50/2010	I	M	P	D	D	P	N	K	S	E	E	I	E	E	Q	M	N	T	G	R	C	K	L	K	N	C	V	K	G	E	A
KX362473.1 RVC/Pig-wt/VNM/14175_22	·	I	·	·	·	S	N	·	L	·	·	·	·	·	Q	·	·	·	G	H	·	·	·	·	·	C	·	·	·	·	·
RVC/Pig/THA/CU13/15/G9_(KX911707)	·	I	·	·	·	S	N	·	L	·	·	·	·	·	R	·	·	·	V	H	·	·	·	·	·	W	·	·	·	·	·
RVC/Pig/THA/CU49/15/G9_(KX911703)	·	I	·	·	·	S	N	·	L	·	·	·	·	·	R	·	·	·	G	R	·	·	·	·	·	C	·	·	·	·	·
RVC/Pig/THA/CU40/15/G9_(KX911705)	·	I	·	·	·	S	N	·	L	·	·	·	·	·	R	·	·	·	G	H	·	·	·	·	·	C	·	·	·	·	·
RVC/Pig/THA/CU-SUN/15/G9_(KX911708)	·	I	·	·	·	S	N	·	L	·	·	·	·	·	R	·	·	·	G	R	·	·	·	·	·	C	·	·	·	·	·
RVC/Pig/THA/CU84/15/G9_(KX911706)	·	I	·	·	·	S	N	·	L	·	·	·	·	·	R	·	·	·	G	H	·	·	·	·	·	C	·	·	·	·	·
RVC/Pig/THA/CU264-U12/13/G9_(KX911704)	·	I	·	·	·	P	A	·	L	·	·	·	·	·	Q	·	·	·	G	H	·	·	·	·	·	C	·	·	·	·	·
RVC/Pig/THA/CU275C/16/G9_(MF139507)	·	I	·	·	·	S	N	·	L	·	·	·	·	·	R	·	·	·	G	H	·	·	·	·	·	C	·	·	·	·	·
RVC/Pig/THA/CU276C/16/G9_(MF139508)	·	I	·	·	·	S	N	·	L	·	·	·	·	·	R	·	·	·	G	H	·	·	·	·	·	C	·	·	·	·	·
